# Supplementary material
Source: PubMed Central journal article supplement (PMC6584891)
Supplement: jamacardiol-4-810-s002.pdf [file jamacardiol-4-810-s002.pdf]

## Supplementary Online Content

Reardon MJ, Heijmen RH, Van Mieghem NM, et al. Comparison of outcomes after transcatheter vs surgical aortic valve replacement among patients at intermediate operative risk with a history of coronary artery bypass graft surgery: a post hoc analysis of the SURTAVI randomized clinical trial. *JAMA Cardiol*. Published online June 19, 2019. doi:10.1001/jamacardio.2019.1856

**eTable 1.** Outcomes with *P* values of interaction of prior CABG (yes/no) and treatment (TAVR/SAVR)

**eTable 2.** Resource utilization

**eFigure 1.** Randomization and analysis populations

**eFigure 2.** Kaplan-Meier all-cause mortality or disabling stroke estimates

**eFigure 3.** New York Heart Association symptom status

**eFigure 4.** Aortic valve hemodynamics

This supplementary material has been provided by the authors to give readers additional information about their work.

**eTable 1.** Outcomes with *P* values of interaction of prior CABG (yes/no) and treatment (TAVR/SAVR)

|                                                | Interaction of prior CABG (Yes/No) and Treatment (TAVR/SAVR)<br>P values (Cox proportional model) |             |
|------------------------------------------------|---------------------------------------------------------------------------------------------------|-------------|
|                                                | 0-30 Days                                                                                         | 0-12 Months |
| <b>All-Cause Mortality or Disabling Stroke</b> | 0.3093                                                                                            | 0.3504      |
| <b>All-Cause Mortality</b>                     | 0.9850                                                                                            | 0.5446      |
| Cardiovascular                                 | 0.9852                                                                                            | 0.8314      |
| Valve-Related <sup>1</sup>                     | NA                                                                                                | 0.9994      |
| Non-Cardiovascular                             | 0.9993                                                                                            | 0.9854      |
| <b>Reintervention</b>                          | 0.9911                                                                                            | 0.7995      |
| Surgical                                       | 0.9966                                                                                            | 0.5403      |
| Percutaneous                                   | 0.9998                                                                                            | 0.9920      |
| <b>Neurological Events</b>                     | 0.3786                                                                                            | 0.3686      |
| All Stroke and TIA                             | 0.9737                                                                                            | 0.6812      |
| All Stroke                                     | 0.7489                                                                                            | 0.6590      |
| Disabling Stroke                               | 0.7248                                                                                            | 0.4819      |
| Ischemic                                       | 0.7988                                                                                            | 0.7327      |
| Hemorrhagic                                    | 0.9991                                                                                            | 0.9374      |
| Undetermined                                   | NA                                                                                                | NA          |
| Non-disabling Stroke                           | 0.5616                                                                                            | 0.9621      |
| Ischemic                                       | 0.6074                                                                                            | 0.6719      |
| Hemorrhagic                                    | NA                                                                                                | NA          |
| Undetermined                                   | 0.9994                                                                                            | 0.9968      |
| TIA                                            | 0.9999                                                                                            | 0.6035      |
| Encephalopathy                                 | 0.4966                                                                                            | 0.1984      |
| Cerebral Infarction-Asymptomatic               | NA                                                                                                | NA          |
| Intracranial Hemorrhage                        | 0.9994                                                                                            | 0.9933      |
| <b>Bleed</b>                                   | 0.4473                                                                                            | 0.7842      |
| Life Threatening or Disabling                  | 0.8529                                                                                            | 0.6970      |
| Major Bleed                                    | 0.0347                                                                                            | 0.0325      |
| <b>Major Vascular Complication</b>             | 0.2006                                                                                            | 0.2345      |
| <b>Acute Kidney Injury</b>                     | 0.9030                                                                                            | 0.9459      |
| Stage 1                                        | 0.4750                                                                                            | 0.5230      |
| Stage 2                                        | 0.9863                                                                                            | 0.9863      |
| Stage 3                                        | 0.9885                                                                                            | 0.9885      |

|                                                       |        |        |
|-------------------------------------------------------|--------|--------|
| Stage 2 or 3                                          | 0.9820 | 0.9820 |
| <b>MI</b>                                             | 0.9460 | 0.1879 |
| Peri-Procedural                                       | 0.9909 | 0.9909 |
| Spontaneous                                           | 0.9951 | 0.0652 |
| <b>Cardiac Perforation</b>                            | 0.9867 | 0.9867 |
| <b>Cardiogenic Shock</b>                              | 0.5851 | 0.9464 |
| <b>Cardiac Tamponade</b>                              | 1.0000 | 1.0000 |
| <b>Valve Endocarditis</b>                             | NA     | 0.9928 |
| <b>Leaflet Motion Abnormality or Valve Thrombosis</b> | 1.0000 | 0.9999 |
| Valve Thrombosis                                      | 0.9993 | 0.9991 |
| Valve Thrombosis (Sub-clinical)                       | NA     | NA     |
| Leaflet Motion Abnormality                            | 0.9994 | 0.9994 |
| <b>MACCE<sup>2</sup></b>                              | 0.9449 | 0.8894 |
| <b>MAE<sup>3</sup></b>                                | 0.9731 | 0.3029 |
| <b>Aortic Valve Hospitalization</b>                   | 0.8092 | 0.9558 |
| <b>Permanent Pacemaker Implant<sup>4</sup></b>        | 0.3393 | 0.8589 |
| <b>Permanent Pacemaker Implant<sup>5</sup></b>        | 0.6787 | 0.8655 |
| <b>Atrial Fibrillation<sup>6</sup></b>                | 0.6628 | 0.6896 |
| <b>Mitral Valve Apparatus Damage</b>                  | NA     | NA     |
| <b>Procedural Conversion</b>                          | 0.6275 | 0.6275 |
| Conversion to open surgery                            | 0.9983 | 0.9983 |
| TAVR Conversion to other Percutaneous                 | 0.9993 | 0.9993 |
| SAVR Conversion to alternate procedure                | 0.9994 | 0.9994 |
| Aborted Procedure                                     | 0.6689 | 0.6689 |
| <b>Coronary Artery Obstruction</b>                    | 0.9991 | 0.9991 |

<sup>1</sup>Valve-related death is any death caused by structural or non-structural valve dysfunction or aortic valve re-intervention.

<sup>2</sup>MACCE includes all-cause death, myocardial infarction (MI), all stroke, and reintervention.

<sup>3</sup>MAE includes all death, MI, all stroke, reintervention, cardiac perforation, cardiac tamponade, cardiogenic shock, valve malpositioning, prosthetic valve dysfunction, acute kidney injury, major vascular complication, life threatening or disabling bleed, major bleed, valve endocarditis.

<sup>4</sup>Subjects with pacemaker or ICD at baseline are not included. Not adjudicated by CEC.

<sup>5</sup>Subjects with pacemaker or ICD at baseline are included. Not adjudicated by CEC.

<sup>6</sup>Not adjudicated by CEC.

**eTable 2.** Resource utilization

|                                          | <b>TAVR<br/>(N=136)</b> | <b>SAVR<br/>(N=137)</b>    | <b>P Value</b> |
|------------------------------------------|-------------------------|----------------------------|----------------|
| Procedure time, minutes                  | 48.5 (34.0, 66.0) (134) | 244.5 (194.5, 308.0) (136) | <0.01          |
| Length of index hospital stay, days      | 4.0 (3.0, 6.0) (136)    | 7.0 (6.0, 11.0) (137)      | <0.01          |
| Length of ICU stay, hours                | 45.6 (22.6, 67.5) (118) | 49.0 (28.0, 94.6) (131)    | <0.01          |
| Discharge location                       |                         |                            | <0.01          |
| Home                                     | 91.9 (125/136)          | 72.3 (99/137)              |                |
| Rehabilitation clinic or skilled nursing | 8.0 (11/136)            | 21.2 (29/137)              |                |
| Another hospital                         | 0.0 (0/136)             | 4.4 (6/137)                |                |
| Other                                    | 0.0 (5/136)             | 1.5 (6/137)                |                |

Data presented as median (Q1, Q3) (total no.) or percentage (no. / total no.). SD indicates standard deviation; TAVR: transcatheter aortic valve replacement; SAVR: surgical aortic valve replacement; and ICU: intensive care unit.

**eFigure 1.** Randomization and analysis populations

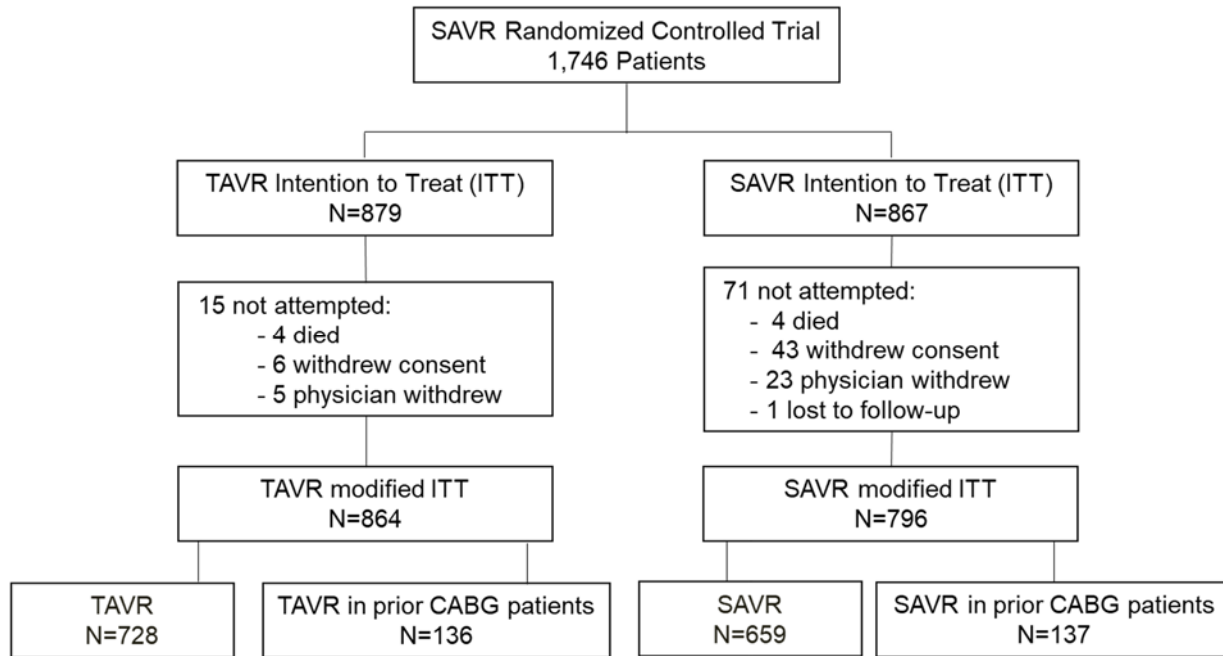

SAVR = surgical aortic valve replacement; TAVR = transcatheter aortic valve replacement; ITT = intention to treat; mITT = modified intention to treat; CABG = coronary artery bypass grafting.

**eFigure 2.** Kaplan-Meier all-cause mortality or disabling stroke estimates

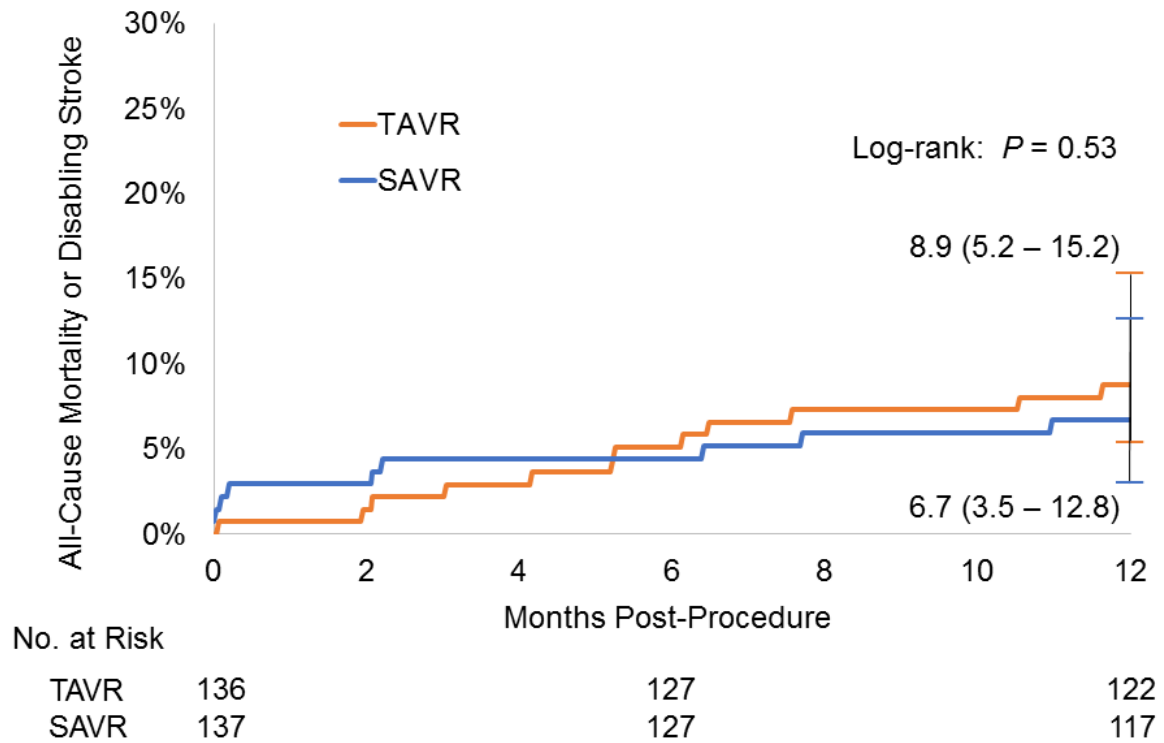

All-cause mortality or disabling stroke at 1 year was similar following transcatheter aortic valve replacement (TAVR) and surgical aortic valve replacement (SAVR).

**eFigure 3.** New York Heart Association symptom status

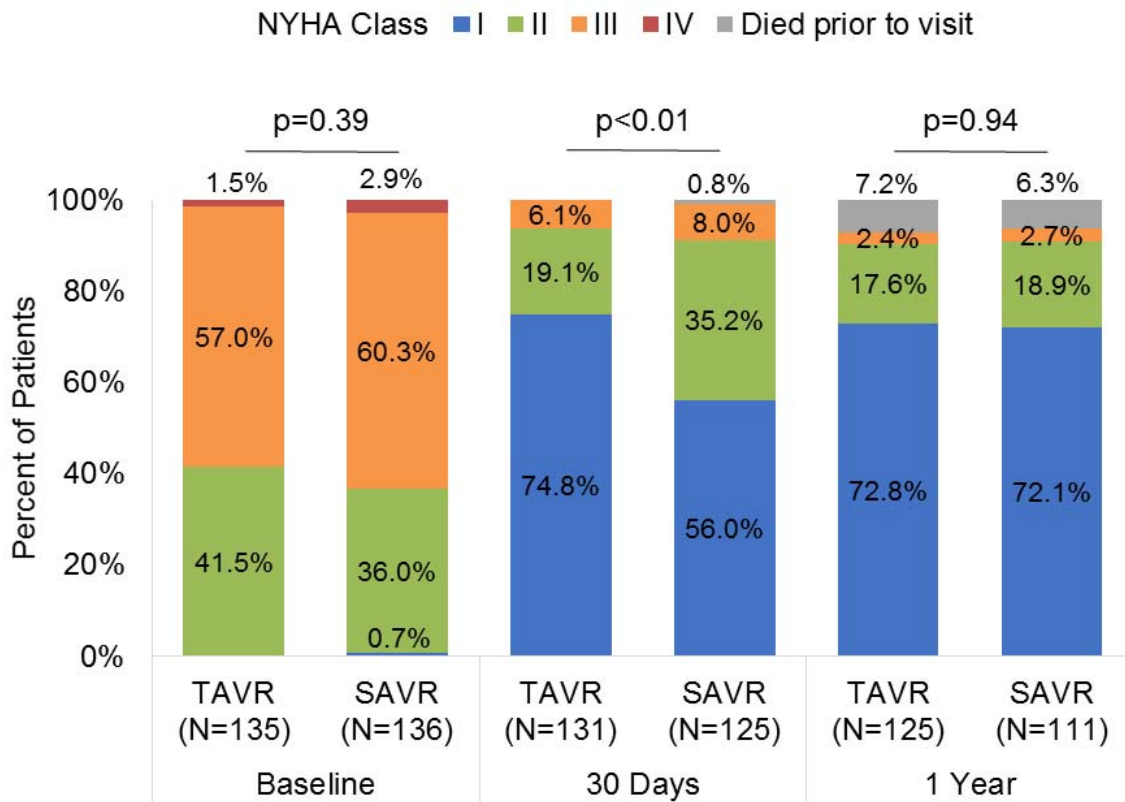

New York Heart Association (NYHA) symptom status was significantly better following transcatheter aortic valve replacement (TAVR) relative to surgical aortic valve replacement (SAVR) at 30 days, but similar between treatments at 1 year.

**eFigure 4.** Aortic valve hemodynamics

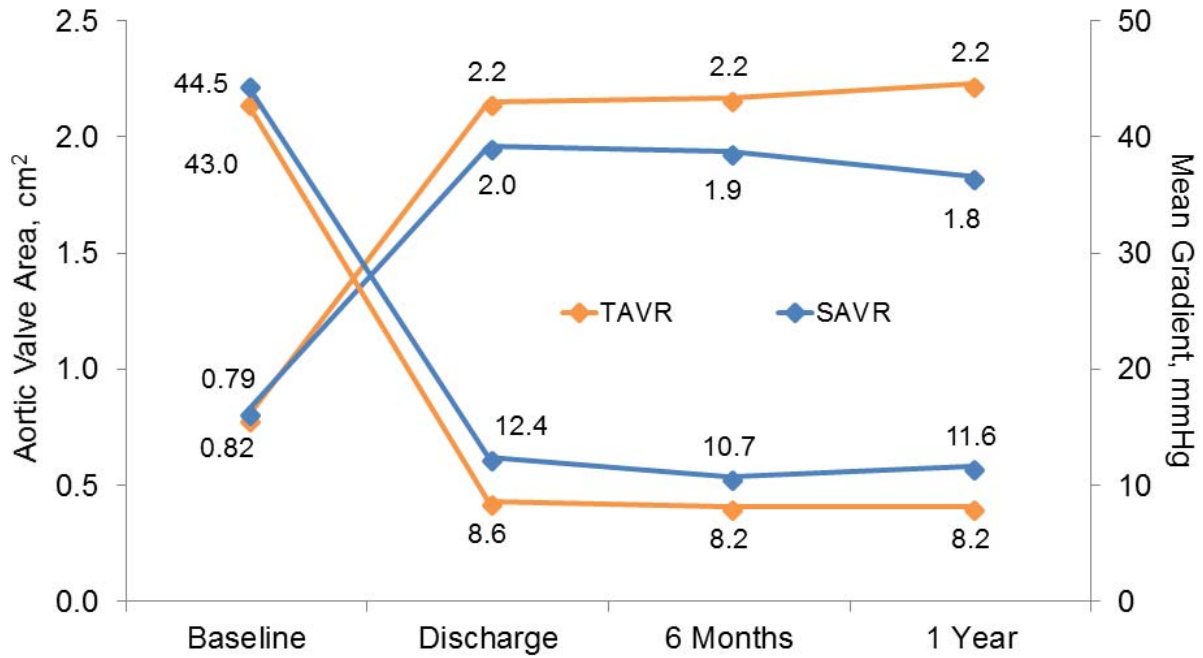

No. of patients with echo data

|          |     |     |     |     |
|----------|-----|-----|-----|-----|
| TAVR AVG | 134 | 133 | 118 | 114 |
| SAVR AVG | 134 | 122 | 116 | 106 |
| TAVR EOA | 125 | 126 | 112 | 106 |
| SAVR EOA | 127 | 98  | 107 | 96  |

Aortic valve area was significantly larger and mean gradient was significantly lower following transcatheter aortic valve replacement (TAVR) relative to surgical aortic valve replacement (SAVR) at all follow-up visits ( $P < 0.001$ )
